# Supplementary material
Source: HighWire-hosted journal article supplement (https://jnm.snmjournals.org/highwire/filestream/110336/field_highwire_adjunct_files/0/264334_Supplemental_Data.pdf)
Supplement: 264334_Supplemental_Data.pdf [file 264334_Supplemental_Data.pdf]

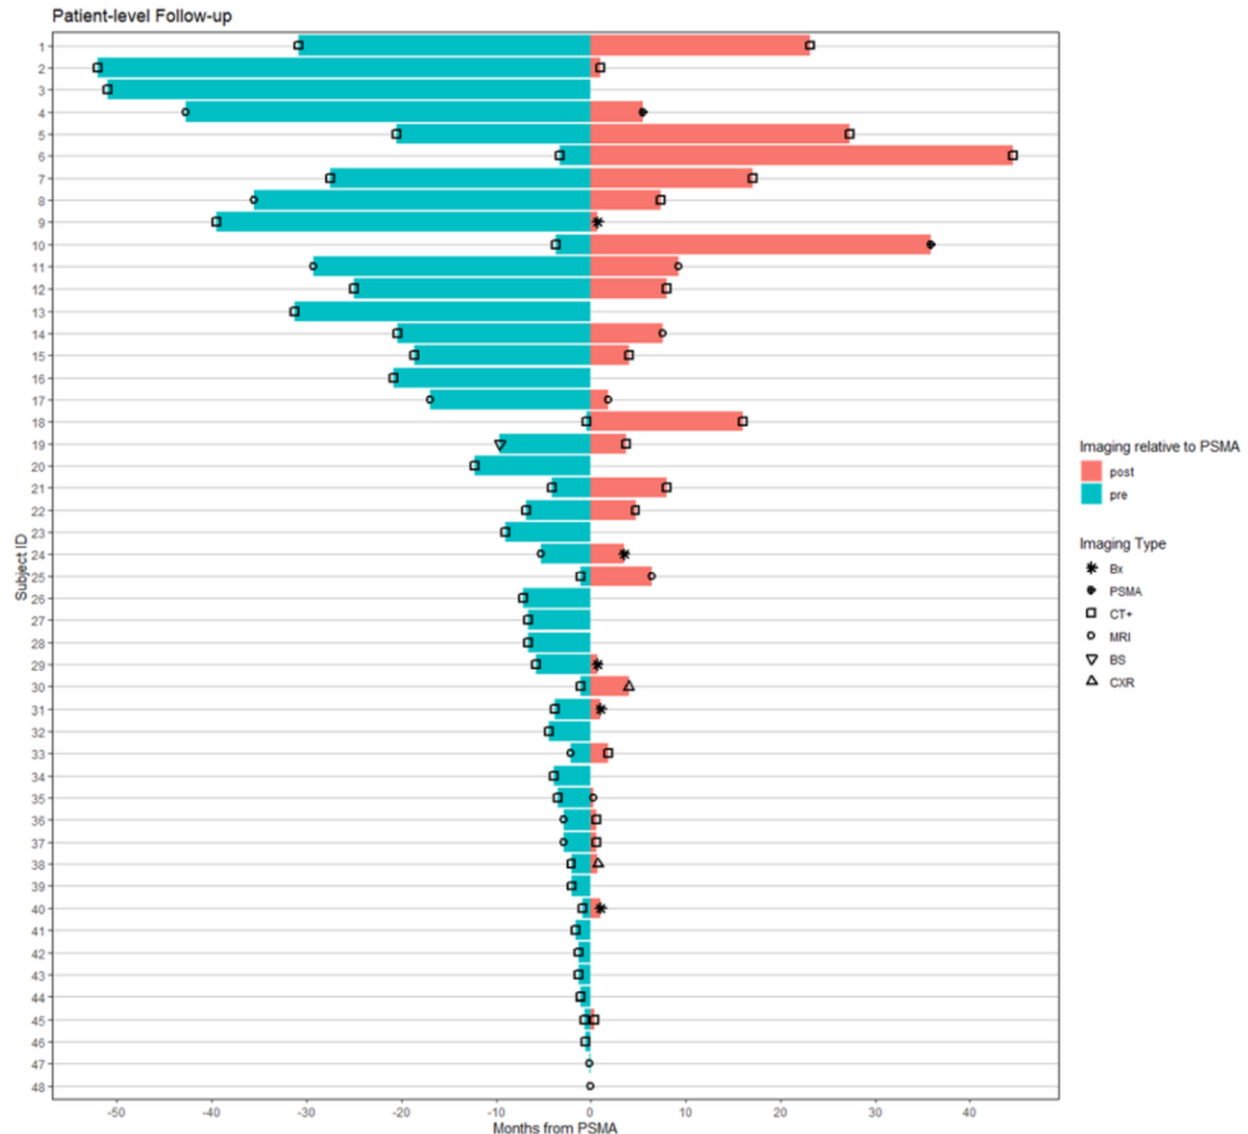

**Supplemental Figure 1.** Patient-level total follow-up duration in months from pre-PSMA (blue) to post-PSMA (red) for all 48 patients with at least one PSMA-positive IBL. Only the earliest and latest follow-up imaging or biopsy information are shown. (\*)Bx = biopsy of the IBL; (●)PSMA =  $^{18}\text{F}$ -DCFPyL PET/CT; (▽)BS =  $^{99\text{m}}\text{Tc}$ -MDP SPECT bone scintigraphy scan; (Δ)CXR = chest x-ray; (○)MRI = magnetic resonance imaging; (□)CT+ = any non-PSMA imaging incorporating CT such as PET/CT, BS/CT, or CT only.

**Supplemental Table 1.** Detailed patient-level pre-PSMA and post-PSMA imaging and interventions for patients with at least one PSMA positive IBL. Imaging modalities that could follow a lesion's status are included and displayed in the order they occurred. All interventions for PCa management except prostate biopsy are included.

| Patient | Treatment Status at PSMA Imaging | Pre-PSMA Imaging                                          | Post-PSMA Imaging                                                        | Pre-PSMA Intervention                       | Post-PSMA Intervention            |
|---------|----------------------------------|-----------------------------------------------------------|--------------------------------------------------------------------------|---------------------------------------------|-----------------------------------|
| 1       | BCR                              | BS/CT, CXR, NaF PET/CT, BS/CT x2                          | BS/CT x3, NaF PET/CT, DCFPyL PET/CT, BS/CT x2, NaF PET/CT, DCFPyL PET/CT | ADT, Brachytherapy, SRP                     | Trial (18-C-0005)                 |
| 2       | BCR                              | BS/CT, NaF PET/CT, BS/CT x2, CT x2                        | BS/CT                                                                    | RP, ADT x2, RT                              | ADT                               |
| 3       | BCR                              | CT x2, Axumin PET/CT, MRI x2                              | None                                                                     | RP, SRT                                     | None                              |
| 4       | BCR                              | MRI x3, Axumin PET/CT, BS/CT, MRI, NaF PET/CT, CXR        | MRI, BS/CT, DCFPyL PET/CT                                                | ADT, Brachytherapy                          | Trial (18-C-0005)                 |
| 5       | High-risk                        | FDG PET/CT x2, CT x3, MRI, BS/CT                          | CT, FDG PET/CT, CT                                                       | None                                        | ADT, Docetaxel, Abiraterone, IMRT |
| 6       | BCR                              | MRI, CT, MRI                                              | NaF PET/CT, BS/CT x6, FDG PET/CT, DCFPyL PET/CT, NaF PET/CT              | ADT, RT, LDR Brachytherapy, ADT             | Trial (16-C-0048)                 |
| 7       | BCR                              | NaF PET/CT, MRI x2, CXR, MRI                              | BS/CT x 2                                                                | RP, ADT, RT                                 | ADT                               |
| 8       | High-risk                        | MRI x2, BS/CT, BS, CT, MRI, BS/CT, NaF PET/CT, BS/CT, MRI | CT x2                                                                    | None                                        | RP                                |
| 9       | BCR                              | CT, MRI, CXR, MR, CT, MRI                                 | biopsy                                                                   | ADT, Enzalutamide, RP                       | None                              |
| 10      | BCR                              | BS/CT, MRI                                                | BS/CT x2, NaF PET/CT, BS/CT x2, FDG PET/CT, NaF PET/CT, DCFPyL PET/CT    | RP, SRT, ADT, Trial (16-C-0035)             | ADT, Enzalutamide                 |
| 11      | BCR                              | MRI x2, BS/CT, MRI                                        | NaF PET/CT, MRI x2                                                       | RP, RT, ADT                                 | Trial (16-C-0048)                 |
| 12      | BCR                              | BS/CT x4                                                  | BS/CT, DCFPyL PET/CT, NaF PET/CT                                         | RT, ADT, Trial (16-C-0035), RCT (15-C-0075) | RP, SBRT, ADT, Enzalutamide       |
| 13      | BCR                              | CXR, CT x2, MRI                                           | None                                                                     | ADT, RT                                     | None                              |
| 14      | BCR                              | BS/CT x2, MRI                                             | MRI                                                                      | RP                                          | Trial (18-C-0028), ADT            |
| 15      | BCR                              | BS/CT x3, NaF PET/CT                                      | NaF PET/CT                                                               | RP, ADT, SRT, Ra-223                        | None                              |
| 16      | BCR                              | CT, CXR, BS/CT, CXR, MRI                                  | None                                                                     | RP                                          | RT                                |
| 17      | High-risk                        | MRI, MRI, CXR, BS/CT, CXR                                 | NaF PET/CT, BS/CT, MRI                                                   | RCT (15-C-0205)                             | Biopsy, RT, ADT                   |

|    |           |                                              |                                                 |                            |                                                |
|----|-----------|----------------------------------------------|-------------------------------------------------|----------------------------|------------------------------------------------|
| 18 | BCR       | CT, BS                                       | BS/CT x2, NaF PET/CT, DCFPyL PET/CT, FDG PET/CT | EBRT, ADT                  | Trial (18-C-0076), ADT, Abiraterone, Denosumab |
| 19 | BCR       | BS, CXR, NaF PET/CT, BS/CT                   | NaF PET/CT x2                                   | RP, RT                     | Trial (18-C-0005)                              |
| 20 | BCR       | FDG PET/CT, BS/CT                            | None                                            | RP                         | None                                           |
| 21 | BCR       | BS/CT, FDG PET/CT, CT                        | CXR, BS/CT, CT                                  | RP                         | Biopsy, ADT                                    |
| 22 | BCR       | BS/CT, NaF PET/CT, DCFPyL, NaF PET/CT        | BS/CT, NaF PET/CT, BS/CT                        | RP, SRT, ADT, Ra-223       | Trial (18-C-0005)                              |
| 23 | BCR       | BS/CT, MRI, BS/CT, MRI                       | None                                            | EBRT                       | None                                           |
| 24 | BCR       | MRI                                          | None                                            | RP, ADT, SRT, ADT          | Biopsy                                         |
| 25 | High-risk | BS/CT                                        | CXR, CT, BS/CT, MRI                             | TURP x4                    | RP                                             |
| 26 | BCR       | BS/CT, CT, Axumin PET/CT                     | None                                            | RP, RT, ADT                | None                                           |
| 27 | BCR       | BS/CT                                        | None                                            | RP, RT                     | None                                           |
| 28 | BCR       | CT, MRI                                      | None                                            | RP, SRT                    | ADT, Sipuleucel-T                              |
| 29 | BCR       | BS/CT, MRI                                   | None                                            | ADT, RT, Abiraterone       | Biopsy, ADT x2                                 |
| 30 | High-risk | BS/CT, NaF PET/CT                            | CXR x2                                          | None                       | Biopsy, EBRT, ADT                              |
| 31 | High-risk | NaF PET/CT                                   | None                                            | None                       | Biopsy, LRP, ADT                               |
| 32 | BCR       | BS/CT, MRI                                   | None                                            | RP, RT                     | ADT, Abiraterone                               |
| 33 | High-risk | MRI, BS/CT, MRI                              | CT, BS/CT                                       | RT                         | RP, ADT, Enzalutamide                          |
| 34 | BCR       | CT, MRI                                      | None                                            | RP, SRT                    | Biopsy, ADT, Docetaxel                         |
| 35 | BCR       | BS/CT, Axumin PET/CT, NaF PET/CT, MRI, BS/CT | MRI                                             | LDR Brachytherapy          | RT                                             |
| 36 | BCR       | MRI                                          | NaF PET/CT                                      | RP                         | None                                           |
| 37 | High-risk | MRI, BS/CT, MRI                              | NaF PET/CT, CT x2                               | None                       | Trial (16-C-0048), RT                          |
| 38 | BCR       | BS/CT                                        | CXR                                             | RT, SRP, ADT x2            | Biopsy, ADT, RT                                |
| 39 | BCR       | CT, NaF PET/CT                               | None                                            | RP, RT                     | None                                           |
| 40 | BCR       | BS/CT                                        | CXR                                             | RP                         | Biopsy                                         |
| 41 | BCR       | CT                                           | None                                            | Brachytherapy, SBRT        | None                                           |
| 42 | High-risk | BS/CT                                        | None                                            | None                       | EBRT, Brachytherapy, ADT                       |
| 43 | High-risk | BS/CT                                        | None                                            | None                       | RP                                             |
| 44 | High-risk | BS/CT                                        | None                                            | None                       | None                                           |
| 45 | High-risk | BS/CT                                        | FDG PET/CT                                      | None                       | ADT, IMRT                                      |
| 46 | BCR       | BS/CT                                        | None                                            | RP, ADT, SRT, Enzalutamide | None                                           |
| 47 | BCR       | MRI, NaF PET/CT                              | None                                            | LRP, SRT, ADT              | None                                           |
| 48 | High-risk | MRI                                          | None                                            | None                       | None                                           |

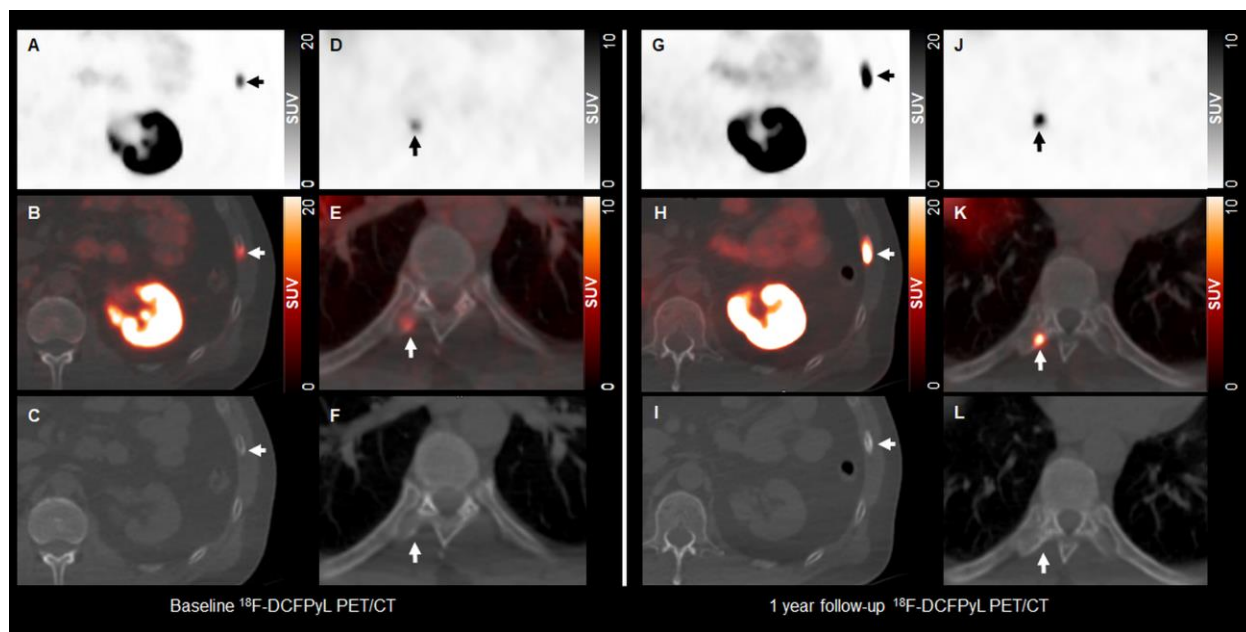

**Supplemental Figure 2.** 58-year-old patient with BCR PCa and PSA of 2.0 ng/mL. Axial  $^{18}\text{F}$ -DCFPyL PET (A, D, G, J),  $^{18}\text{F}$ -DCFPyL PET/CT (B, E, H, K), and CT (C, F, I, L) images demonstrate multifocal PSMA-avid uptake. A-F: Baseline  $^{18}\text{F}$ -DCFPyL PET/CT shows PSMA-avid uptake with  $\text{SUV}_{\text{max}}$  of 12.1 in the left 9<sup>th</sup> rib and subtle sclerotic CT features (A-C, left arrows) and another subtle PSMA-avid uptake with  $\text{SUV}_{\text{max}}$  of 3.8 in the right T8 transverse process with subtle sclerotic CT features (D-F, up arrows). G-L: A 15-month follow-up  $^{18}\text{F}$ -DCFPyL PET/CT scan showed that both lesions had intense PSMA uptake and sclerotic morphological changes (arrows), and additional PSMA-avid lesions were present (not shown). Thus, the IBLs in A-F were determined to be malignant.

**Supplemental Table 2.**  $^{18}\text{F}$ -DCFPyL PET/CT based lesion and scan variables that do not predict IBL interpretation. Statistical significance is evaluated based on 3-way interpretation (M vs. B vs. E). IBL=indeterminate bone lesion; mets=metastases; B=benign; E=equivocal; M=malignant.

| Non-predictive Variables            |               | Interpretation of IBLs (n=98) |                  |                  | Statistical Significance                                       |
|-------------------------------------|---------------|-------------------------------|------------------|------------------|----------------------------------------------------------------|
|                                     |               | Malignant (n=42)              | Benign (n=37)    | Equivocal (n=19) | P-value (n=98)                                                 |
| SUV <sub>max</sub> , Median (range) |               | 10.6<br>(1.0–35.9)            | 2.9<br>(1.2–8.8) | 2.1<br>(1.2–6.4) | M vs. B: $P=0.288$<br>M vs. E: $P=0.525$<br>B vs. E: $P=0.688$ |
| CT feature                          | sclerotic     | 7                             | 8                | 7                | $P=0.608$                                                      |
|                                     | lytic         | 4                             | 0                | 0                |                                                                |
|                                     | mixed         | 2                             | 4                | 1                |                                                                |
|                                     | negative      | 29                            | 24               | 12               |                                                                |
| PSMA-avid lymph nodes               | negative      | 15                            | 31               | 5                | $P=0.113$                                                      |
|                                     | positive      | 27                            | 6                | 14               |                                                                |
| PSMA-avid bone lesions              | one IBL       | 4                             | 17               | 9                | $P=0.299$                                                      |
|                                     | $\geq 2$ IBLs | 27                            | 18               | 8                |                                                                |
|                                     | other mets    | 11                            | 2                | 2                |                                                                |

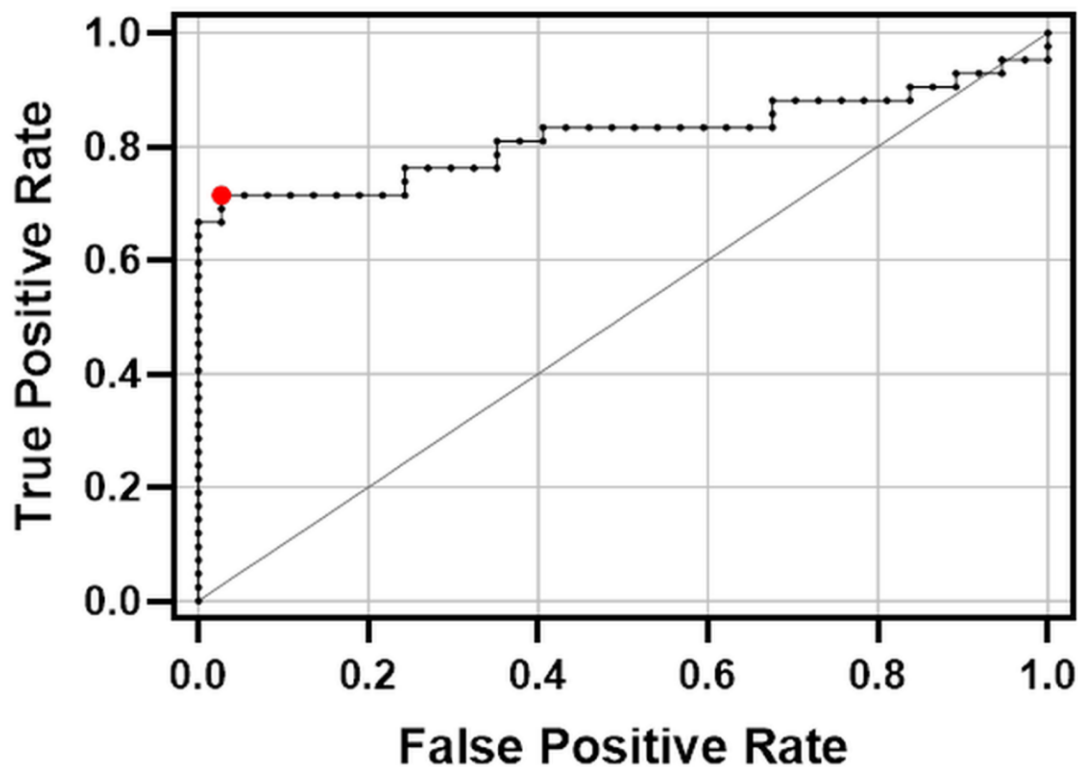

**Supplemental Figure 3.** ROC curve evaluating the  $SUV_{max}$  of IBLs interpreted as benign or malignant (n=79). The red point indicates the selected threshold of  $SUV_{max}$  equal to 5 based on the maximized Youden index which had the highest true positive rate (sensitivity, y-axis) and the least false positive rate (1-specificity, x-axis).
